# Supplementary material
Source: Springer Nature journal article supplement (https://www.springermedizin.de/resource/supplementary/12916_2011_477_MOESM2_ESM.pdf/9599780)
Supplement: MOESM2 [file 9599780]

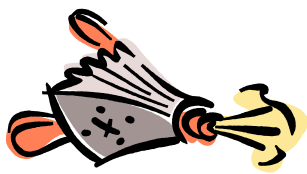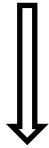

> 10 ml/kg pbw

6 ml/kg pbw

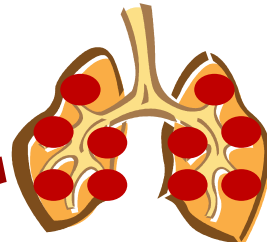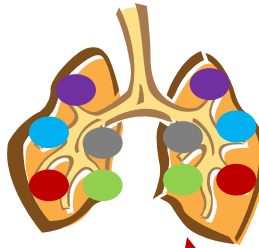

**Inflammation  
Cell injury**

BAL  
Breath  
Imaging  
Physiology

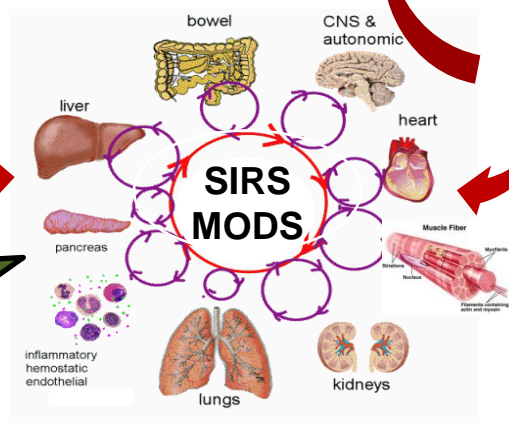

Organ  
dysfunction  
Death
